# Supplementary material
Source: publisher site journal article supplement (https://www.dovepress.com/article/325646)
Supplement: Supplementary file 1 [file get_supplementary_file.php]

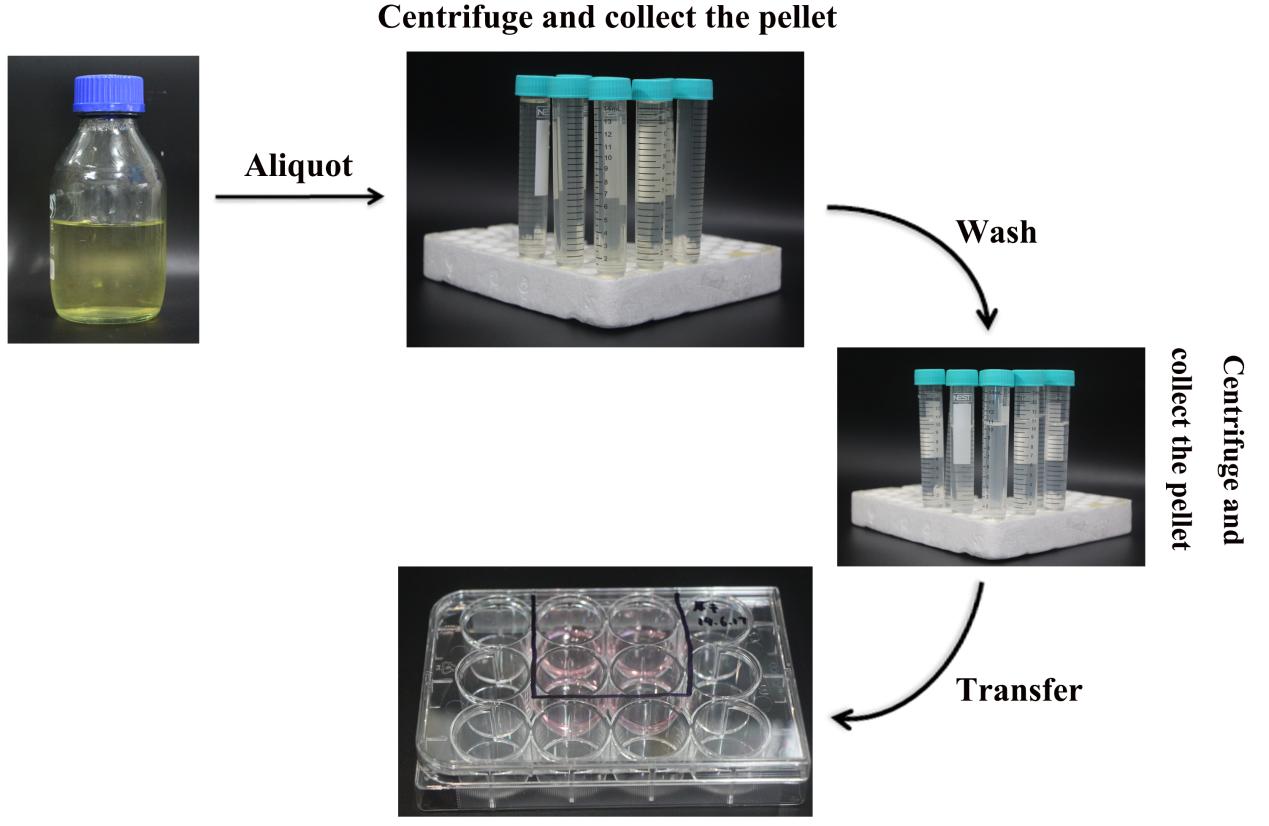


**Supplementary Figure S1** Collection and isolation of urinary cells. Urine (50–200 ml) was collected in a sterile container, evenly transferred to 15 ml tubes and centrifuged. The pellets were resuspended in PBS and centrifuged. Cells were washed carefully and then transferred to one well of a 12-well plate in primary medium.


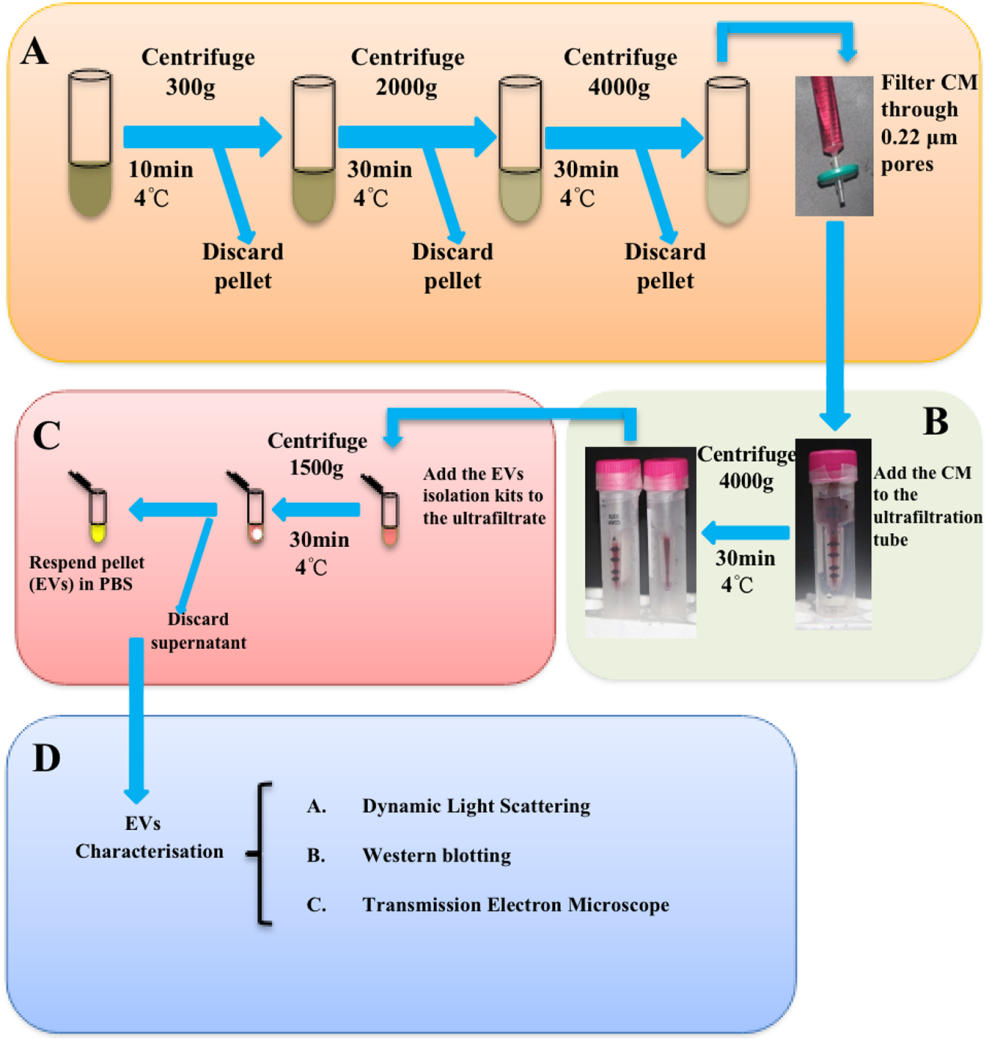


**Supplementary Figure S2** Isolation and characterization of USC-EVs. **(A)** Dead cells and cell debris were precleared from harvested CM. **(B)** Supernatant was added to an Amicon Ultra15 Centrifugal Filter Unit tube. **(C)** EVs were isolated from CM using a commercial kit. **(D)** Isolated EVs were then characterized.

**
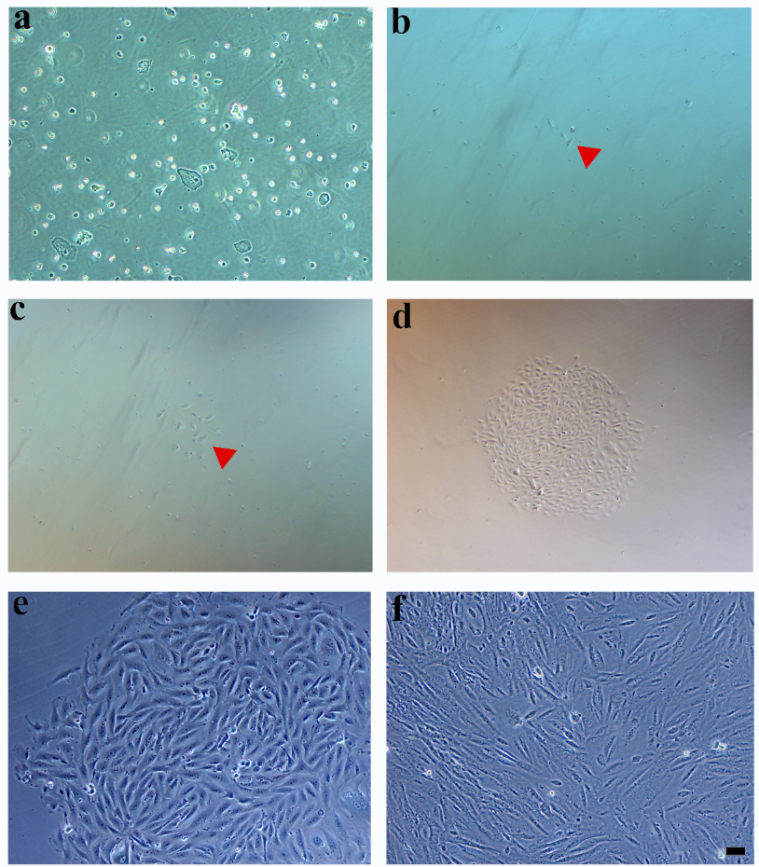
**

**Supplementary Figure S3** Morphology of USCs at different time points after collection. **(a)** Fresh male urine samples contained a few blood cells. **(b-f)** Morphology and growth of USCs (arrowheads) on days 4 **(b)**, 5 **(c)**, 9 **(d)**, 10 **(e)** and 12 **(f)**. Scale bars: 200 µm.

**
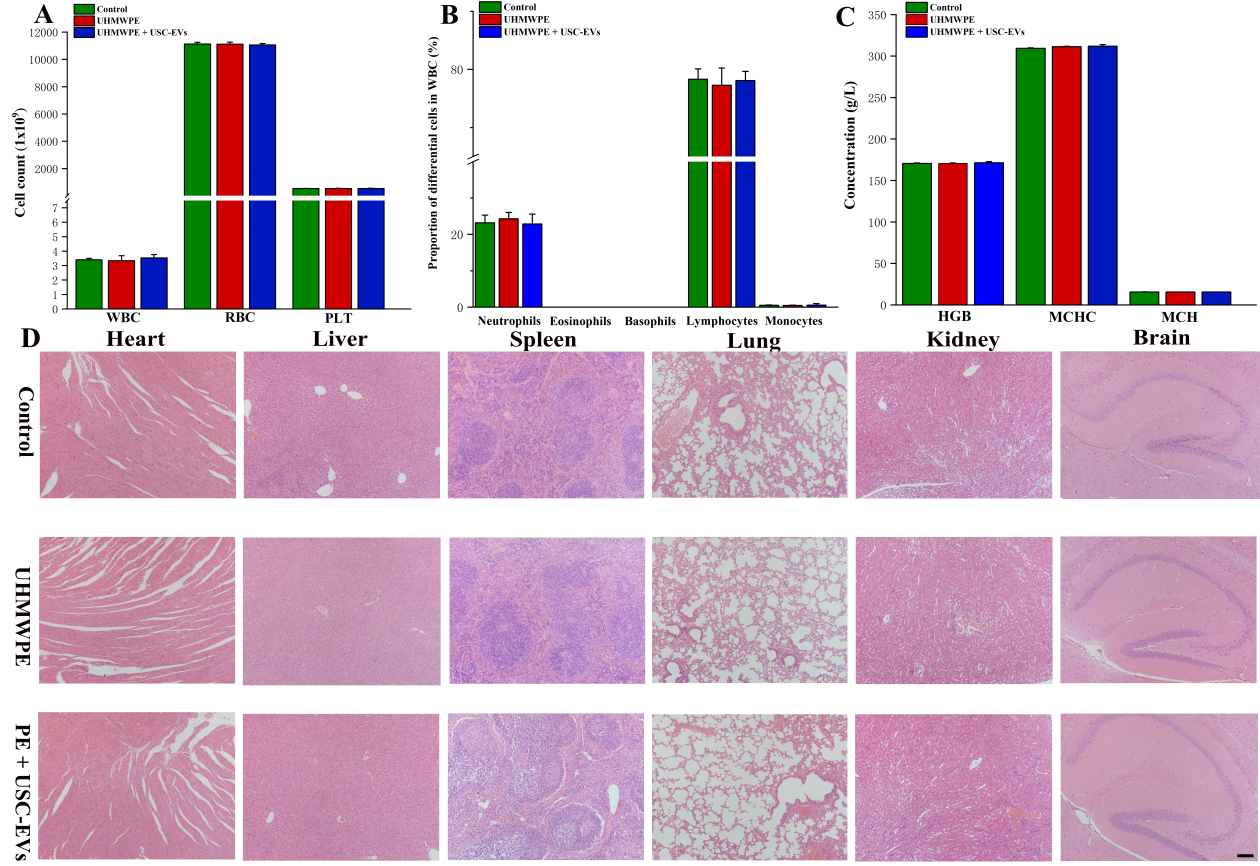
**

**Supplementary Figure S4** Biocompatibility and safety of USC-EVs. **(A)** Complete cell counts in the control, UHMWPE and UHMWPE + USC-EV groups. n=10 samples per group. **(B)** Proportions of differential white blood cell counts among the groups. n=10 samples per group. **(C)** Routine blood examination parameters among the groups. n=10 samples per group. **(D)** H&E staining of major organs from the different groups. Scale bar: 100 μm.
